# Supplementary material
Source: PubMed Central journal article supplement (PMC10148094)
Supplement: mmc1.pdf [file mmc1.pdf]

## Supplementary Information

### Development of a desktop mask charger

Taisuke Ikawa<sup>1</sup>, Kaito Fujita<sup>1</sup>, Shota Kiuchi<sup>1</sup>, Muhang Li<sup>1</sup>, Atsuhito Kushima<sup>1</sup>, Hayato Takase<sup>1</sup>, Bratati Das<sup>1</sup>, Megumi Morita<sup>2</sup>, Hiroyuki Todo<sup>2</sup>, Miles Pennington<sup>1\*</sup>, Kaori Sugihara<sup>1\*</sup>

<sup>1</sup>Institute of Industrial Science, The University of Tokyo, 4-6-1 Komaba Meguro-Ku, Tokyo 153-8505, Japan

<sup>2</sup>Shirohato Co., Ltd., 121-1 yayoicho Minami-ku, Nagoya-shi, Aichi 457-0027, Japan

\*Correspondence: miles@designlab.ac, kaori-s@iis.u-tokyo.ac.jp

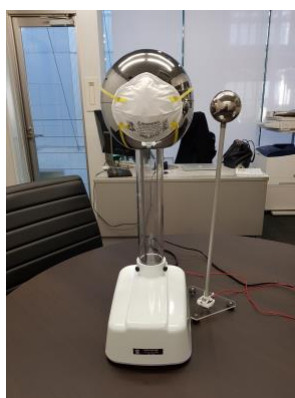

Figure S1: A van de Graaff generator

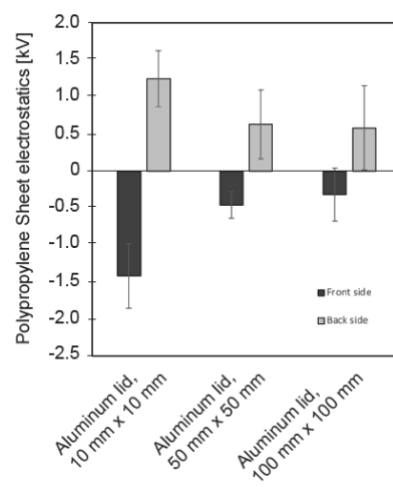

Figure S2: Aluminum lid size dependence on the polypropylene sheet charging capability.
